# Supplementary material
Source: HighWire-hosted journal article supplement (https://www.annfammed.org/highwire/filestream/13475/field_highwire_adjunct_files/0/Hernandez_Supplemental_Information.pdf)
Supplement: Hernandez_Supplemental_Information.pdf [file Hernandez_Supplemental_Information.pdf]

## Supplemental materials for:

Cooper E, Mohanan S, Garcia C, et al. An in-clinic food pharmacy addresses very low food Security. *Ann Fam Med*. 2020;18(6):564.

Emily Cooper, MD, MHA, FAAFP<sup>1</sup>

Sveta Mohanan, MD<sup>1</sup>

Christina Garcia, DO, MPH<sup>1</sup>

Tamara Baldwin Thomas, MSW, LCSW<sup>1</sup>

Holly Ozgun, BSPH<sup>2</sup>

Brisa Hernandez, BUS<sup>3</sup>

Iris Cheng, MD, FACP<sup>1</sup>

Alisabah J. Cole, MD<sup>3</sup>

<sup>1</sup>Atrium Health Biddle Point Family Medicine, Charlotte, North Carolina

<sup>2</sup>Atrium Health Elizabeth Family Medicine Research, Charlotte, North Carolina

<sup>3</sup>CommonSpirit Health, San Francisco, California

<sup>4</sup>Atrium Health Myers Park Internal Medicine, Charlotte, North Carolina

### Supplemental Figure 1.

Bags of food were pre-assembled by a community health teammate so that staff could quickly deliver a bag at check-out. Each bag contained 2 whole-grain items (eg, cereal, pasta), 45 oz of low-sodium vegetables, 30 oz of low-sugar fruit, 16 oz of low-sodium canned meat, and 1 low-fat shelf-stable dairy item. The bag also contained a printed MyPlate educational form, designed by the USDA, as well as a printed form with guidance on making healthier choices on a budget, designed by Atrium Health nutritionists.

**Key words:** social determinants of health; food insecurity; food pharmacy; partnership; primary care issues, access to care/barriers to access; primary care issues, clinician-patient communication/relationship

**Submitted June 20, 2019; submitted, revised, April 7, 2020; accepted April 16, 2020.**

**Funding support:** funding support was provided by the Duke Endowment.

**Acknowledgments:** We thank the following individuals and groups for their critical support of this innovation: Tina Postel, Executive Director, and Angie Brumer, Operations Director, at Loaves & Fishes; Sue McKellar, Practice Manager at Biddle Point; Andrea Badillo-Perez, research assistant from the University of North Carolina at Charlotte; Kaitlyn Werner, Registered Dietitian Nutritionist; and the Social and Economic Team at Atrium Health.

---

## References

1. Gundersen C, Ziliak JP. Food insecurity and health outcomes. *Health Aff (Millwood)*. 2015;34(11):1830-1839. 10.1377/hlthaff.2015.0645.
2. United States Department of Agriculture Economic Research Service. Definitions of food security. Published 2018. Accessed Jun 12, 2019. <https://www.ers.usda.gov/topics/food-nutrition-assistance/food-security-in-the-us/definitions-of-food-security/>
